# Supplementary material
Source: MDPI journal article supplement (https://www.mdpi.com/2673-964X/3/4/20)
Supplement: s1 [file s1]

# Supplementary Materials: Mussel Shells from Marine Aquaculture Act like Ecosystem Engineers: Legacy Effects on Benthic Communities

**Table S1.** Pairwise correlation among physicochemical variables (*Spearman* coefficient) by regions.

| Atlantic                      |         |         |                              |                               |         |
|-------------------------------|---------|---------|------------------------------|-------------------------------|---------|
|                               | Redox   | AVS     | NH <sup>+</sup> <sub>4</sub> | PO <sub>4</sub> <sup>3-</sup> | OM      |
| Redox                         | 1.0000  | -0.0714 | 0.3412                       | 0.2024                        | 0.0146  |
| AVS                           | -0.0714 | 1.0000  | -0.3296                      | 0.2144                        | 0.6254  |
| NH <sup>+</sup> <sub>4</sub>  | 0.3412  | -0.3296 | 1.0000                       | 0.2240                        | -0.7289 |
| PO <sub>4</sub> <sup>3-</sup> | 0.2024  | 0.2144  | 0.2240                       | 1.0000                        | 0.1090  |
| OM                            | 0.0146  | 0.6254  | -0.7289                      | 0.1090                        | 1.0000  |
| Mediterranean                 |         |         |                              |                               |         |
|                               | Redox   | AVS     | NH <sup>+</sup> <sub>4</sub> | PO <sub>4</sub> <sup>3-</sup> | OM      |
| Redox                         | 1.0000  | 0.0078  | -0.3135                      | 0.0718                        | -0.1360 |
| AVS                           | 0.0078  | 1.0000  | -0.2070                      | -0.1526                       | -0.1826 |
| NH <sup>+</sup> <sub>4</sub>  | -0.3135 | -0.2070 | 1.0000                       | 0.6278                        | 0.4926  |
| PO <sub>4</sub> <sup>3-</sup> | 0.0718  | -0.1526 | 0.6278                       | 1.0000                        | 0.3607  |
| OM                            | -0.1360 | -0.1826 | 0.4926                       | 0.3607                        | 1.0000  |

**Table S2.** Mean, standard deviation, minimum, and maximum values of physicochemical variables at the two regions by mussel shells treatment, by treatments NO= without mussel shells, YES = with mussel shells.

| Mussel shells   | Atlantic     |              | Mediterranean  |               | Overall       |               |
|-----------------|--------------|--------------|----------------|---------------|---------------|---------------|
|                 | NO           | YES          | NO             | YES           | NO            | YES           |
| OM              |              |              |                |               |               |               |
| Mean (SD)       | 3.64 (0.223) | 4.64 (0.271) | 0.834 (0.112)  | 1.03 (0.163)  | 2.24 (1.44)   | 2.84 (1.86)   |
| [Min, Max]      | [3.29, 4.11] | [4.28, 5.11] | [0.680, 1.02]  | [0.820, 1.36] | [0.680, 4.11] | [0.820, 5.11] |
| REDOX           |              |              |                |               |               |               |
| Mean (SD)       | -404 (20.6)  | -405 (17.4)  | -20.2 (23.3)   | -61.4 (43.1)  | -212 (197)    | -233 (178)    |
| [Min, Max]      | [-440, -355] | [-432, -382] | [-89.5, -1.60] | [-147, -7.10] | [-440, -1.60] | [-432, -7.10] |
| AVS             |              |              |                |               |               |               |
| Mean (SD)       | 188 (81.4)   | 384 (151)    | 16.5 (8.23)    | 18.7 (21.5)   | 102 (105)     | 201 (214)     |
| [Min, Max]      | [90.1, 334]  | [160, 707]   | [7.62, 35.5]   | [0.290, 69.3] | [7.62, 334]   | [0.290, 707]  |
| NH <sub>4</sub> |              |              |                |               |               |               |
| Mean (SD)       | 90.5 (1.32)  | 87.4 (2.19)  | 81.9 (47.2)    | 129 (15.2)    | 86.2 (33.0)   | 108 (23.7)    |
| [Min, Max]      | [88.5, 92.4] | [83.6, 90.8] | [35.6, 217]    | [107, 159]    | [35.6, 217]   | [83.6, 159]   |
| PO <sub>4</sub> |              |              |                |               |               |               |
| Mean (SD)       | 37.5 (2.27)  | 38.2 (0.883) | 9.71 (2.46)    | 12.1 (3.43)   | 23.6 (14.4)   | 25.1 (13.5)   |
| [Min, Max]      | [32.2, 39.5] | [36.8, 39.4] | [4.55, 13.8]   | [8.13, 17.5]  | [4.55, 39.5]  | [8.13, 39.4]  |

**Table S3.** Mean  $\pm$  standard deviation (SD), median and minimum (Min) and maximum (Max) values of polychaete families abundances (ind m<sup>-2</sup>) in the Atlantic region, by treatments NO= without mussel shells, YES = with mussel shells.

|                   | NO              | YES              | Overall          |
|-------------------|-----------------|------------------|------------------|
| Ampharetidae      |                 |                  |                  |
| Mean (SD)         | 6.95 (17.3)     | 0 (0)            | 3.47 (12.5)      |
| Median [Min, Max] | 0 [0, 55.6]     | 0 [0, 0]         | 0 [0, 55.6]      |
| Aphroditidae      |                 |                  |                  |
| Mean (SD)         | 0 (0)           | 6.94 (24.1)      | 3.47 (17.0)      |
| Median [Min, Max] | 0 [0, 0]        | 0 [0, 83.3]      | 0 [0, 83.3]      |
| Capitellidae      |                 |                  |                  |
| Mean (SD)         | 1630 (1880)     | 1480 (782)       | 1550 (1410)      |
| Median [Min, Max] | 931 [111, 5920] | 1510 [139, 2420] | 1260 [111, 5920] |
| Cirratulidae      |                 |                  |                  |
| Mean (SD)         | 50.9 (60.2)     | 64.8 (76.1)      | 57.9 (67.5)      |
| Median [Min, Max] | 27.8 [0, 194]   | 41.7 [0, 194]    | 27.8 [0, 194]    |
| Cossuridae        |                 |                  |                  |
| Mean (SD)         | 2.32 (8.02)     | 0 (0)            | 1.16 (5.67)      |
| Median [Min, Max] | 0 [0, 27.8]     | 0 [0, 0]         | 0 [0, 27.8]      |
| Dorvilleidae      |                 |                  |                  |
| Mean (SD)         | 16.2 (32.3)     | 6.95 (17.3)      | 11.6 (25.8)      |
| Median [Min, Max] | 0 [0, 111]      | 0 [0, 55.6]      | 0 [0, 111]       |
| Eunicidae         |                 |                  |                  |
| Mean (SD)         | 0 (0)           | 6.94 (24.1)      | 3.47 (17.0)      |
| Median [Min, Max] | 0 [0, 0]        | 0 [0, 83.3]      | 0 [0, 83.3]      |
| Lumbrineridae     |                 |                  |                  |
| Mean (SD)         | 4.63 (10.8)     | 16.2 (34.4)      | 10.4 (25.7)      |
| Median [Min, Max] | 0 [0, 27.8]     | 0 [0, 111]       | 0 [0, 111]       |
| Maldanidae        |                 |                  |                  |
| Mean (SD)         | 2.32 (8.02)     | 0 (0)            | 1.16 (5.67)      |
| Median [Min, Max] | 0 [0, 27.8]     | 0 [0, 0]         | 0 [0, 27.8]      |
| Nephtyidae        |                 |                  |                  |
| Mean (SD)         | 2.32 (8.02)     | 0 (0)            | 1.16 (5.67)      |
| Median [Min, Max] | 0 [0, 27.8]     | 0 [0, 0]         | 0 [0, 27.8]      |
| Nereididae        |                 |                  |                  |
| Mean (SD)         | 48.6 (37.7)     | 34.7 (41.2)      | 41.7 (39.3)      |
| Median [Min, Max] | 41.7 [0, 111]   | 27.8 [0, 139]    | 27.8 [0, 139]    |
| Onuphidae         |                 |                  |                  |
| Mean (SD)         | 0 (0)           | 4.63 (10.8)      | 2.32 (7.84)      |
| Median [Min, Max] | 0 [0, 0]        | 0 [0, 27.8]      | 0 [0, 27.8]      |
| Orbiniidae        |                 |                  |                  |
| Mean (SD)         | 2.32 (8.02)     | 0 (0)            | 1.16 (5.67)      |
| Median [Min, Max] | 0 [0, 27.8]     | 0 [0, 0]         | 0 [0, 27.8]      |
| Paraonidae        |                 |                  |                  |
| Mean (SD)         | 71.8 (67.5)     | 99.5 (63.2)      | 85.6 (65.5)      |
| Median [Min, Max] | 83.3 [0, 250]   | 97.2 [0, 222]    | 83.3 [0, 250]    |
| Phyllodocidae     |                 |                  |                  |
| Mean (SD)         | 9.26 (18.1)     | 18.5 (64.1)      | 13.9 (46.3)      |
| Median [Min, Max] | 0 [0, 55.6]     | 0 [0, 222]       | 0 [0, 222]       |
| Poecilochaetidae  |                 |                  |                  |
| Mean (SD)         | 2.32 (8.02)     | 0 (0)            | 1.16 (5.67)      |
| Median [Min, Max] | 0 [0, 27.8]     | 0 [0, 0]         | 0 [0, 27.8]      |

|                   | NO            | YES           | Overall       |
|-------------------|---------------|---------------|---------------|
| Polynoidae        |               |               |               |
| Mean (SD)         | 0 (0)         | 9.26 (24.7)   | 4.63 (17.7)   |
| Median [Min, Max] | 0 [0, 0]      | 0 [0, 83.3]   | 0 [0, 83.3]   |
| Sabellidae        |               |               |               |
| Mean (SD)         | 4.63 (10.8)   | 2.32 (8.02)   | 3.47 (9.38)   |
| Median [Min, Max] | 0 [0, 27.8]   | 0 [0, 27.8]   | 0 [0, 27.8]   |
| Scalibregmatidae  |               |               |               |
| Mean (SD)         | 0 (0)         | 9.26 (32.1)   | 4.63 (22.7)   |
| Median [Min, Max] | 0 [0, 0]      | 0 [0, 111]    | 0 [0, 111]    |
| Sigalionidae      |               |               |               |
| Mean (SD)         | 13.9 (32.4)   | 0 (0)         | 6.94 (23.5)   |
| Median [Min, Max] | 0 [0, 83.3]   | 0 [0, 0]      | 0 [0, 83.3]   |
| Spionidae         |               |               |               |
| Mean (SD)         | 113 (125)     | 50.9 (45.6)   | 82.2 (97.4)   |
| Median [Min, Max] | 55.6 [0, 444] | 41.7 [0, 167] | 55.6 [0, 444] |
| Syllidae          |               |               |               |
| Mean (SD)         | 4.63 (10.8)   | 16.2 (34.4)   | 10.4 (25.7)   |
| Median [Min, Max] | 0 [0, 27.8]   | 0 [0, 111]    | 0 [0, 111]    |
| Terebellidae      |               |               |               |
| Mean (SD)         | 2.32 (8.02)   | 4.63 (16.0)   | 3.47 (12.5)   |
| Median [Min, Max] | 0 [0, 27.8]   | 0 [0, 55.6]   | 0 [0, 55.6]   |

**Table S4.** Mean  $\pm$  standard deviation (SD), median and minimum (Min) and maximum (Max) values of polychaete families abundances (ind m<sup>-2</sup>) in the Mediterranean region, by treatments NO= without mussel shells, YES = with mussel shells.

|                   | NO          | YES           | Overall       |
|-------------------|-------------|---------------|---------------|
| Ampharetidae      |             |               |               |
| Mean (SD)         | 0 (0)       | 2.32 (8.02)   | 1.16 (5.67)   |
| Median [Min, Max] | 0 [0, 0]    | 0 [0, 27.8]   | 0 [0, 27.8]   |
| Capitellidae      |             |               |               |
| Mean (SD)         | 23.1 (40.7) | 81.0 (46.6)   | 52.1 (52.0)   |
| Median [Min, Max] | 0 [0, 139]  | 83.3 [0, 167] | 27.8 [0, 167] |
| Chaetopteridae    |             |               |               |
| Mean (SD)         | 9.26 (13.7) | 69.4 (85.0)   | 39.4 (67.0)   |
| Median [Min, Max] | 0 [0, 27.8] | 41.7 [0, 306] | 27.8 [0, 306] |
| Cirratulidae      |             |               |               |
| Mean (SD)         | 4.63 (10.8) | 9.26 (18.1)   | 6.95 (14.8)   |
| Median [Min, Max] | 0 [0, 27.8] | 0 [0, 55.6]   | 0 [0, 55.6]   |
| Dorvilleidae      |             |               |               |
| Mean (SD)         | 2.32 (8.02) | 20.8 (41.2)   | 11.6 (30.6)   |
| Median [Min, Max] | 0 [0, 27.8] | 0 [0, 139]    | 0 [0, 139]    |
| Eunicidae         |             |               |               |
| Mean (SD)         | 2.32 (8.02) | 9.26 (18.1)   | 5.79 (14.1)   |
| Median [Min, Max] | 0 [0, 27.8] | 0 [0, 55.6]   | 0 [0, 55.6]   |
| Glyceridae        |             |               |               |
| Mean (SD)         | 2.32 (8.02) | 4.63 (16.0)   | 3.47 (12.5)   |
| Median [Min, Max] | 0 [0, 27.8] | 0 [0, 55.6]   | 0 [0, 55.6]   |
| Hesionidae        |             |               |               |

|                   | NO             | YES         | Overall     |
|-------------------|----------------|-------------|-------------|
| Mean (SD)         | 2.32 (8.02)    | 2.32 (8.02) | 2.32 (7.84) |
| Median [Min, Max] | 0 [0, 27.8]    | 0 [0, 27.8] | 0 [0, 27.8] |
| Lumbrineridae     |                |             |             |
| Mean (SD)         | 23.1 (28.6)    | 2.32 (8.02) | 12.7 (23.1) |
| Median [Min, Max] | 13.9 [0, 83.3] | 0 [0, 27.8] | 0 [0, 83.3] |
| Magelonidae       |                |             |             |
| Mean (SD)         | 0 (0)          | 2.32 (8.02) | 1.16 (5.67) |
| Median [Min, Max] | 0 [0, 0]       | 0 [0, 27.8] | 0 [0, 27.8] |
| Maldanidae        |                |             |             |
| Mean (SD)         | 0 (0)          | 6.95 (12.6) | 3.47 (9.38) |
| Median [Min, Max] | 0 [0, 0]       | 0 [0, 27.8] | 0 [0, 27.8] |
| Nephtyidae        |                |             |             |
| Mean (SD)         | 9.26 (18.1)    | 6.95 (17.3) | 8.10 (17.3) |
| Median [Min, Max] | 0 [0, 55.6]    | 0 [0, 55.6] | 0 [0, 55.6] |
| Nereididae        |                |             |             |
| Mean (SD)         | 13.9 (25.1)    | 23.1 (33.1) | 18.5 (29.2) |
| Median [Min, Max] | 0 [0, 83.3]    | 0 [0, 83.3] | 0 [0, 83.3] |
| Onuphidae         |                |             |             |
| Mean (SD)         | 0 (0)          | 4.63 (16.0) | 2.32 (11.3) |
| Median [Min, Max] | 0 [0, 0]       | 0 [0, 55.6] | 0 [0, 55.6] |
| Opheliidae        |                |             |             |
| Mean (SD)         | 0 (0)          | 4.63 (16.0) | 2.32 (11.3) |
| Median [Min, Max] | 0 [0, 0]       | 0 [0, 55.6] | 0 [0, 55.6] |
| Orbiniidae        |                |             |             |
| Mean (SD)         | 4.63 (10.8)    | 2.32 (8.02) | 3.47 (9.38) |
| Median [Min, Max] | 0 [0, 27.8]    | 0 [0, 27.8] | 0 [0, 27.8] |
| Oweniidae         |                |             |             |
| Mean (SD)         | 0 (0)          | 4.63 (10.8) | 2.32 (7.84) |
| Median [Min, Max] | 0 [0, 0]       | 0 [0, 27.8] | 0 [0, 27.8] |
| Paraonidae        |                |             |             |
| Mean (SD)         | 23.1 (35.2)    | 13.9 (22.2) | 18.5 (29.2) |
| Median [Min, Max] | 0 [0, 111]     | 0 [0, 55.6] | 0 [0, 111]  |
| Pectinariidae     |                |             |             |
| Mean (SD)         | 4.63 (10.8)    | 0 (0)       | 2.32 (7.84) |
| Median [Min, Max] | 0 [0, 27.8]    | 0 [0, 0]    | 0 [0, 27.8] |
| Phyllodocidae     |                |             |             |
| Mean (SD)         | 4.63 (16.0)    | 2.32 (8.02) | 3.47 (12.5) |
| Median [Min, Max] | 0 [0, 55.6]    | 0 [0, 27.8] | 0 [0, 55.6] |
| Poecilochaetidae  |                |             |             |
| Mean (SD)         | 23.1 (28.6)    | 18.5 (24.7) | 20.8 (26.2) |
| Median [Min, Max] | 13.9 [0, 83.3] | 0 [0, 55.6] | 0 [0, 83.3] |
| Sabellidae        |                |             |             |
| Mean (SD)         | 2.32 (8.02)    | 0 (0)       | 1.16 (5.67) |
| Median [Min, Max] | 0 [0, 27.8]    | 0 [0, 0]    | 0 [0, 27.8] |
| Scalibregmatidae  |                |             |             |
| Mean (SD)         | 4.63 (10.8)    | 9.26 (24.7) | 6.94 (18.8) |
| Median [Min, Max] | 0 [0, 27.8]    | 0 [0, 83.3] | 0 [0, 83.3] |
| Sigalionidae      |                |             |             |
| Mean (SD)         | 0 (0)          | 2.32 (8.02) | 1.16 (5.67) |
| Median [Min, Max] | 0 [0, 0]       | 0 [0, 27.8] | 0 [0, 27.8] |

|                   | NO            | YES             | Overall       |
|-------------------|---------------|-----------------|---------------|
| Spionidae         |               |                 |               |
| Mean (SD)         | 0 (0)         | 64.3 (223)      | 32.2 (158)    |
| Median [Min, Max] | 0 [0, 0]      | 0 [0, 772]      | 0 [0, 772]    |
| Syllidae          |               |                 |               |
| Mean (SD)         | 48.6 (44.5)   | 127 (84.1)      | 88.0 (77.1)   |
| Median [Min, Max] | 41.7 [0, 111] | 125 [27.8, 333] | 83.3 [0, 333] |

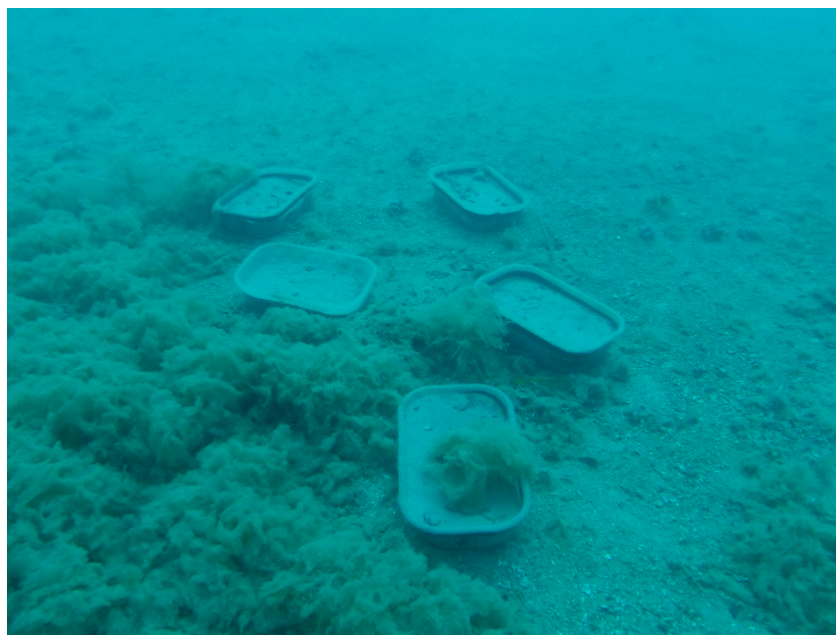

**Figure S1.** Experimental units, with different type of sediment depending on the region and two treatments, with mussel shells and without mussel shells, were deployed on the sea bottom and collected after 35 days.

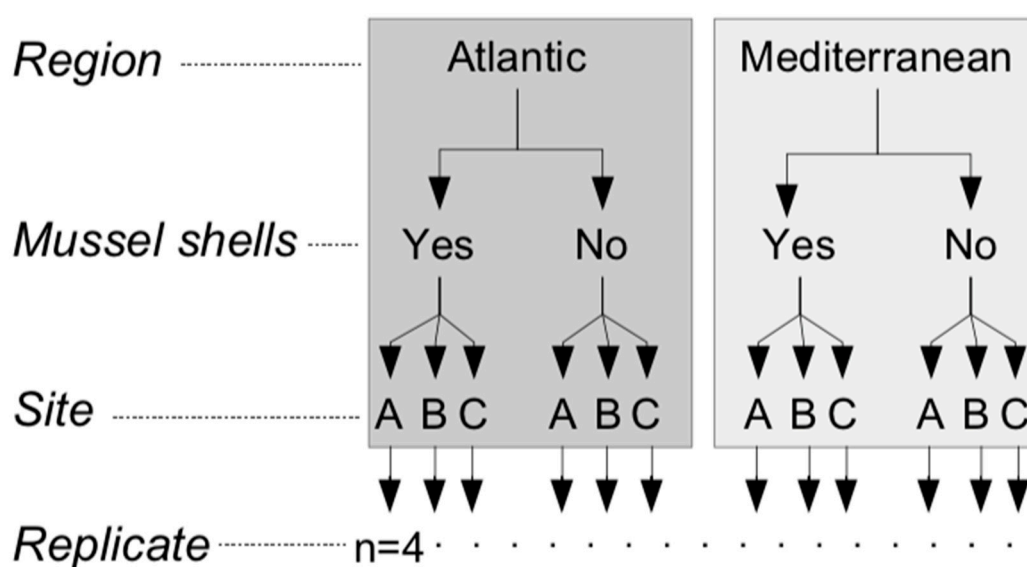

**Figure S2.** Experimental design for comparison of physicochemical variables and abundance of fauna. Polychaete families, due to the different assemblage structure, were analyzed separately by region.
